# Supplementary material
Source: bioRxiv or medRxiv preprint supplement (http://medrxiv.stage.highwire.org/highwire/filestream/91365/field_highwire_adjunct_files/2/2020.07.27.20163147-3.pdf)
Supplement: Supplementary file [file 2020.07.27.20163147-3.pdf]

Make a master mix (MM) with 11ul \* #samples BLT + 11ul \* #samples TB1Modified NEXTERA FLEX  
PROTOCOL

1. In a 96 well plate add up to 10ug of DNA and bring the volume to 30ul for ALL samples

\*\*\*label the plate well\*\*\*

## 2. TAGMENT

A. Make a master mix (MM) with 11ul \* #samples **BLT** + 11ul \* #samples **TB1**

\*\*\*Make sure BLT is mixed well before making master mix\*\*\*\*

-BLT 4C, TB1 -20C

B. divide the MM equally into an 8 tube PCR strip

C. use a multichannel pipette to add 20ul of MM to each sample.

D. Pipette up and down 10 times to mix well (be gentle)

F. Put adhesive foil over the 96 well plate

G. Put in the thermal cycler

RUN \*\*\*(lid 100C, 55C 15 min, hold at 10C)\*\*\*

## 3. POST TAGMENTATION CLEANUP

A. Add 10ul **TSB** to each reaction (use a multichannel pipette and 8 tube pcr strip)

-TSB 4C (use at RT)

B. Pipette up and down 10 times

C. Seal plate with new adhesive foil

D. Put in thermal cycler

Run: \*\*\*(lid 100, 37C 15 min, hold at 10C)\*\*\*

E. Remove plate from thermocycler and put on magnet ~3min until solution is clear

F. Remove supernatant while plate is on the magnet

G. Remove plate from magnet and add 100ul **TWB** to each well and pipette slowly up and down to resuspend the beads

- TWB 4C (use at RT)

H. Place plate back on the magnet and wait ~3 until the solution is clear

REPEAT STEPS F, G, H

## 4 INDICES and AMPLIFICATION

A. Prepare PCR master mix: 22ul \* #samples **EPM** + 22ul \* #samples WATER

\*\*\*Mix Well\*\*\*

-EPM -20C

B. Remove supernatant while plate is on the magnet

C. Take the plate off of the magnet and add **40ul** PCR master mix directly to the beads and pipette up and down to resuspend.

D. Seal plate and centrifuge at 280g for 3 seconds (TQ cell culture)

E. Add 10ul indices (using a 20ul multichannel pipette puncture the foil on the indices plate and transfer 10ul of each indices to sample plate)

\*\*\*Pipette up and down to resuspend\*\*\*

F. Seal with adhesive foil and spin at 280g for ~15-30sec

G. Put in thermal cycler with lid set to 100C and

RUN: 68C 3min -> 98C 3min -> 12X cycles(98C 45sec , 62C 30sec, 68C 2min) -> 68C 1min ->  
Hold at 10C

\*\*\*When complete, put in 4 degrees for storage\*\*\*

## 5. LIBRARY CLEANUP

- A. Centrifuge plate at 280g for 1 min
- B. Place plate on magnet and wait until liquid is clear
- C. Transfer supernatant to a new 96 well plate (keep samples in order)
- D. Add 81ul **SPB** to each sample and pipette up and down 10 times to mix  
\*\*\*Vortex and invert SPB to mix\*\*\*
- E. Seal and incubate at RT for 5 minutes
- F. Place plate on magnet and wait until liquid is clear
- G. Remove the supernatant and discard (without disturbing the beads)
- H. Wash two times:
  - a. With plate on magnet add 200ul 80% EtOH
  - b. Incubate for 30 seconds
  - c. Without disturbing the beads remove and discard the supernatant
- I. Use 20ul pipette to remove and discard the residual ETOH
- J. Air Dry the beads on the magnet for 5 minutes
- K. Remove plate from magnet and add 32ul RSB and pipette to resuspend beads
- L. Incubate for 2min at RT
- M. Place plate on magnet and wait until liquid is clear
- N. Transfer ~30ul supernatant to a new 96 well plate (keep samples in order)

## 6. QUBIT SAMPLES-- USE DNA High Sensitivity Kit!!!

- A. Tubes QuBit tubes for each sample and TWO standards (Standard 1 and Standard 2)
- B. Make a master mix with 199ul \* #samples **Qubit HS Buffer** + 1ul \* #samples **HS Qubit dye**
- C. Add 190ul of Buffer+Dye solution to the TWO standard tubes
- D. Add 199ul of Buffer+Dye to the sample tubes
- E. Add 10ul of Standard 1 to the Standard 1 tube and Vortex
- F. Add 10ul of Standard 2 to the Standard 2 tube and Vortex
- G. Add 1ul of Samples to each Sample tube and Vortex
- H. Read standards on QuBit to generate a standard curve
- I. Read Samples

\*\*Record samples values in ng/ul

\*\*Make sure you set the dilution factor to 1ul!!!

\*\*\*For samples >600ng/ML please nanodrop to get a concentration

## 7. Dilute to 4nanoMolar assuming 300bp average library size (calculations on spreadsheet)

\*\*\*STOP\*\*\*

## 8. Pool 1ul of each sample

## 9. Tapestation

## 10.Run QC seq
